# Supplementary material
Source: PubMed Central journal article supplement (PMC5703191)

### Supplemental Data

**Supplemental Table S1: Vinclozolin P60-150 generation animal body, testis weight and serum testosterone (T) levels.**

| <b>Generation</b>     | <b>Body Weight (gm)</b> | <b>Testis Weight (mg)</b> | <b>Testis/Body Ratio <math>\times 10^{-3}</math></b> | <b>T Levels (ng/ml)</b> |
|-----------------------|-------------------------|---------------------------|------------------------------------------------------|-------------------------|
| <b>F1 Control</b>     | 513 $\pm$ 12.63         | 3.95 $\pm$ 0.14           | 7.79 $\pm$ 0.25                                      | 3.34 $\pm$ 0.39         |
| <b>F1 vinclozolin</b> | 517 $\pm$ 12.00         | 3.67 $\pm$ 0.08           | 7.11 $\pm$ 0.19                                      | 3.88 $\pm$ 0.40         |
| <b>F2 Control</b>     | 416 $\pm$ 25.13         | 3.54 $\pm$ 0.12           | 8.64 $\pm$ 0.34                                      | 5.35 $\pm$ 1.14         |
| <b>F2 vinclozolin</b> | 414 $\pm$ 27.36         | 3.41 $\pm$ 0.09           | 8.47 $\pm$ 0.46                                      | 4.78 $\pm$ 1.14         |
| <b>F3 Control</b>     | 551 $\pm$ 14.96         | 4.18 $\pm$ 0.09           | 7.60 $\pm$ 0.17                                      | 3.65 $\pm$ 0.42         |
| <b>F3 vinclozolin</b> | 537 $\pm$ 15.80         | 3.66 $\pm$ 0.08           | 6.85 $\pm$ 0.11                                      | 3.62 $\pm$ 0.30         |

The different generations data were collected at different times. Exact age matched controls were used within a generation, but ages varied between generations within the developmental period indicated.

**Supplemental Table S2: Flutamide and P60-150<sup>+</sup> generation animal body, testis weight serum testosterone (T) levels.**

| <b>Generation</b>             | <b>Body Weight (gm)</b> | <b>Testis Weight (mg)</b> | <b>Testis/Body Ratio <math>\times 10^{-3}</math></b> | <b>T Levels (ng/ml)</b> |
|-------------------------------|-------------------------|---------------------------|------------------------------------------------------|-------------------------|
| <b>F1 Control</b>             | 409 $\pm$ 40.27         | 3.33 $\pm$ 0.13           | 8.45 $\pm$ 0.53                                      | 2.17 $\pm$ 0.49         |
| <b>F1 Flutamide 5mg</b>       | 405 $\pm$ 32.37         | 3.21 $\pm$ 0.18           | 8.02 $\pm$ 0.26                                      | 7.35 $\pm$ 1.36(*)      |
| <b>F1 Flutamide 20mg</b>      | 445 $\pm$ 34.37         | 3.38 $\pm$ 0.16           | 7.76 $\pm$ 0.35                                      | 2.90 $\pm$ 0.36         |
| <b>F2 Control</b>             | 480 $\pm$ 25.40         | 3.66 $\pm$ 0.07           | 7.89 $\pm$ 0.43                                      | 3.75 $\pm$ 0.45         |
| <b>F2 Flutamide 5mg</b>       | 388 $\pm$ 18.53         | 2.86 $\pm$ 0.16           | 7.45 $\pm$ 0.49                                      | 2.17 $\pm$ 0.41         |
| <b>F2 Flutamide 20mg</b>      | 495 $\pm$ 26.12         | 3.75 $\pm$ 0.11           | 7.71 $\pm$ 0.25                                      | 2.83 $\pm$ 0.38         |
| <b>F3 Control<sup>+</sup></b> | 265 $\pm$ 2.88          | 2.68 $\pm$ 0.14           | 10.32 $\pm$ 0.41                                     | 2.90 $\pm$ 0.26         |
| <b>F3 Flutamide 5mg</b>       | 402 $\pm$ 28.39         | 3.52 $\pm$ 0.15           | 8.81 $\pm$ 0.24                                      | 1.14 $\pm$ 0.34         |
| <b>F3 Flutamide 20mg</b>      | 390 $\pm$ 31.89         | 3.37 $\pm$ 0.08           | 8.84 $\pm$ 0.80                                      | 0.57 $\pm$ 0.07         |

**(\*) indicates significant difference compared to controls**

The different generations data were collected at different times. Exact age matched controls were used within a generation, but ages varied between generations within the developmental period indicated. Note (+), the F3 control animals were collected at postnatal day 22, so were outside the P60-150 range for all other weights and T level data.

**Supplemental Table S3: Vinclozolin P160-360 generation animal body, testis weight and serum testosterone (T) levels.**

| <b>Vinclozolin animals</b> |                         |                           |                                                      |                         |
|----------------------------|-------------------------|---------------------------|------------------------------------------------------|-------------------------|
| <b>Generation/Dose</b>     | <b>Body Weight (gm)</b> | <b>Testis Weight (mg)</b> | <b>Testis/Body Ratio <math>\times 10^{-3}</math></b> | <b>T Levels (ng/ml)</b> |
| F1 Control                 | 676 $\pm$ 26.0          | 4.02 $\pm$ 0.13           | 5.97 $\pm$ 0.22                                      | 1.86 $\pm$ 0.45         |
| F1 Vinclozolin 100mg       | 635 $\pm$ 17.35         | 3.79 $\pm$ 0.11           | 5.99 $\pm$ 0.16                                      | 1.74 $\pm$ 0.24         |
| F2 Control                 | 589 $\pm$ 18.27         | 3.99 $\pm$ 0.08           | 6.88 $\pm$ 0.22                                      | 1.02 $\pm$ 0.07         |
| F2 Vinclozolin 100mg       | 692 $\pm$ 21.16         | 3.09 $\pm$ 0.07           | 5.71 $\pm$ 0.16                                      | 1.15 $\pm$ 0.12         |
| F3 Control                 | 518 $\pm$ 12.14         | 4.02 $\pm$ 0.11           | 7.76 $\pm$ 0.21                                      | 1.21 $\pm$ 0.20         |
| F3 Vinclozolin 100mg       | 601 $\pm$ 20.0          | 4.00 $\pm$ 0.05           | 6.75 $\pm$ 0.20                                      | 1.47 $\pm$ 0.22         |

The different generations data were collected at different times. Exact age matched controls were used within a generation, but ages varied between generations within the developmental period indicated.

**Supplemental Table S4: Flutamide P160-360 generation animal body, testis weight and serum testosterone (T) levels.**

| <b>Flutamide Animals</b> |                         |                           |                                                      |                         |
|--------------------------|-------------------------|---------------------------|------------------------------------------------------|-------------------------|
| <b>Generation/Dose</b>   | <b>Body Weight (gm)</b> | <b>Testis Weight (mg)</b> | <b>Testis/Body Ratio <math>\times 10^{-3}</math></b> | <b>T Levels (ng/ml)</b> |
| F1 Control               | 325 $\pm$ 9.27          | 3.10 $\pm$ 0.10           | 9.53 $\pm$ 0.20                                      | 1.28 $\pm$ 0.39         |
| F1 Flutamide 5mg         | 343 $\pm$ 23.22         | 2.86 $\pm$ 0.13           | 8.39 $\pm$ 0.36                                      | 10.6 $\pm$ 0.75 (*)     |
| F1 Flutamide 20mg        | 356 $\pm$ 12.12         | 3.00 $\pm$ 0.04           | 8.46 $\pm$ 0.40                                      | 2.92 $\pm$ 0.65 (*)     |
| F2 Control               | 544 $\pm$ 19.53         | 3.69 $\pm$ 0.08           | 6.87 $\pm$ 0.23                                      | 1.55 $\pm$ 0.20         |
| F2 Flutamide 5mg         | 518 $\pm$ 11.30         | 3.21 $\pm$ 0.11           | 6.28 $\pm$ 0.28                                      | 1.49 $\pm$ 0.14         |
| F2 Flutamide 20mg        | 565 $\pm$ 23.92         | 3.96 $\pm$ 0.06           | 7.14 $\pm$ 0.23                                      | 1.42 $\pm$ 0.37         |
| F3 Control               | 576 $\pm$ 9.34          | 3.79 $\pm$ 0.05           | 6.60 $\pm$ 0.17                                      | 0.622 $\pm$ 0.03        |
| F3 Flutamide 5mg         | 513 $\pm$ 21.41         | 3.52 $\pm$ 0.12           | 6.89 $\pm$ 0.25                                      | 0.55 $\pm$ 0.19 (*)     |
| F3 Flutamide 20mg        | 584 $\pm$ 10.21         | 3.98 $\pm$ 0.09           | 6.83 $\pm$ 0.18                                      | 0.80 $\pm$ 0.13         |

(\*) denotes significant difference compared to controls

The different generations data were collected at different times. Exact age matched controls were used within a generation, but ages varied between generations within the developmental period indicated.

**Supplemental Figure S1:** Caudal epididymal sperm motility (A) and number (B) in P160-360 control and flutamide F1, F2 and F3 generation male rats. Statistically significant differences between control and treated generations are indicated by (\*) for  $p < 0.05$ . The  $n$  value for each bar ranged between 10 and 25 animals.

A

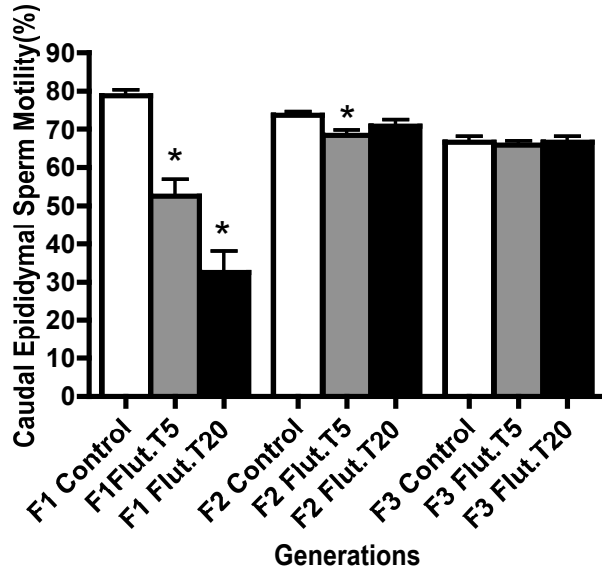

B

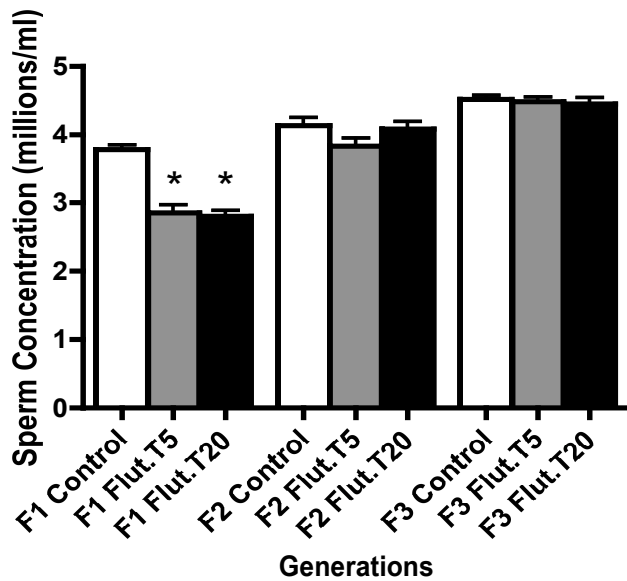

**Supplemental Figure S2:** Photograph of low dose T5 (5mg/kg/day) Flutamide F2 generation animal with supernumary development (polymelia) of limbs. The multiple limbs are indicated with arrows.

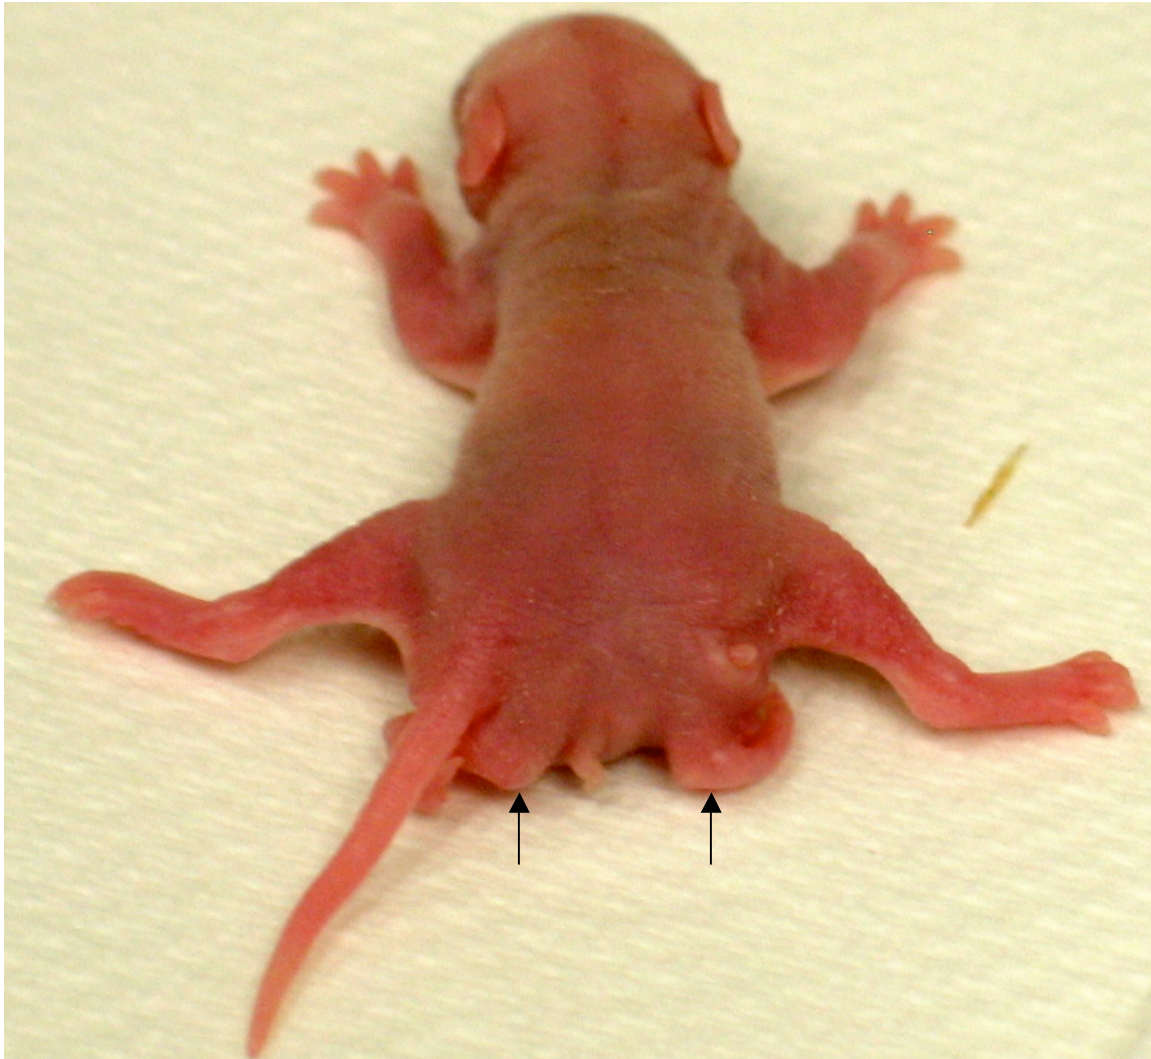

Supplement: NIHMS768188-supplement-Supplemental_Data.pdf [file NIHMS768188-supplement-Supplemental_Data.pdf]
